# Supplementary material
Source: publisher site journal article supplement (https://www.dovepress.com/article/456903)
Supplement: Supplementary file 1 [file get_supplementary_file.php]

Table S1 Description and definition of OSA symptoms, clinical features and PSG indicators

| **OSA symptoms** | **Description** | **Definition in ML models** |
| --- | --- | --- |
| Snoring | Snoring at night or be told to have snoring while in sleep | Yes = 1, No = 0, not mentioned in case = 0 |
| Witnessed apnea | Frequency of being told to have long pauses between breaths while in sleep | ≥ 1 time/week = 1, < 1 time/week = 0, not mentioned in case = 0 |
| Frequent awakening | Frequency of awakening while in sleep | ≥ 3 times/night = 1, < 3 times/night = 0, not mentioned in case = 0 |
| Dry throat at waking | Experiencing dry throat while waking up | Yes = 1, No = 0, not mentioned in case = 0 |
| Morning headache | Experiencing morning headache while waking up in the morning | Yes = 1, No = 0, not mentioned in case = 0 |
| **Clinical features** | **Definition** |  |
| Age of onset | Age of onset of [excessive daytime sleepiness](https://www.sciencedirect.com/topics/medicine-and-dentistry/excessive-daytime-sleepiness) |  |
| **PSG indicators** | **Definition** |  |
| Apnea | ≥90% decrease in airflow for ≥10 s |  |
| Hypopnea | ≥30% decrease in airflow ≥10 s associated with ≥4% reduction in arterial oxygen saturation |  |
| Severity of OSA | Normal (AHI < 5), mild (AHI 5-14.9), moderate (AHI 15-29.9) and severe (AHI ≥ 30) | Mild = 1, Moderate = 2, Severe = 3 |
| Severity of hypoxemia | Normal (min SaO2≥ 90%), mild (85 ≤ min SaO2 < 90%), moderate (80 ≤ min SaO2 < 85%), severe (min SaO2 < 80%) | Normal =1, Mild = 2, Moderate = 3, Severe = 4 |

PSG, [polysomnography](javascript:;); OSA, [obstructive sleep apnea](javascript:;).

Table S2 Pre and post ESS of patients with and without comorbid NT1

| ESS score | Pre-treatment | Post-treatment | P-value |
| --- | --- | --- | --- |
|  | Mean ± SD | |  |
| Patients with OSA without comorbid NT1 | N=164 | N=142 (sleep position change or CPAP) |  |
| 11.52 ± 2.82 | 6.07 ± 3.86 | **＜0.001** |
| Patients with OSA with comorbid NT1 | N=25 | N=25 (sleep position change or CPAP) |  |
| 18.04 ± 3.26 | 18.68 ± 3.39 | 0.499 |
| Patients with OSA with comorbid NT1 | N=65 | N=55 (anti-cataplectic drugs or stimulants) |  |
| 18.54 ± 3.05 | 13.64 ± 3.01 | **＜0.001** |

ESS, Epworth sleepiness scale; OSA, [obstructive sleep apnea](javascript:;). Footnote: bold font indicates significant results.
